# Supplementary material for: An Improved Duplex Real-Time Quantitative RT-PCR Assay with a Canine Endogenous Internal Positive Control for More Sensitive and Reliable Detection of Canine Parainfluenza Virus 5
Source: MDPI journal article supplement (doi:10.3390/vetsci10020142), 2023-02-10
Supplement: s1 [file s1]

**Table S1.** Genome sequences of PIV5 strains collected from the GenBank database.

| No. | Host                    | Strain                      | Collected Country | Collected year | GenBank accession number |
|-----|-------------------------|-----------------------------|-------------------|----------------|--------------------------|
| 1   | Canine                  | CPI+                        | United States     | 1980           | JQ743321                 |
| 2   | Canine                  | CPI-                        | United States     | 1980           | JQ743320                 |
| 3   | Canine                  | D277                        | South Korea       | 2008           | KC237065                 |
| 4   | Canine                  | 08-1990                     | South Korea       | 2009           | KC237063                 |
| 5   | Canine                  | 1168-1                      | South Korea       | 2009           | KC237064                 |
| 6   | Canine                  | 78524                       | United Kingdom    | 2014           | JQ743319                 |
| 7   | Canine                  | H221                        | United Kingdom    | 2014           | JQ743323                 |
| 8   | Canine                  | CPIV-HeN0718                | China             | 2015           | KY114804                 |
| 9   | Canine                  | CC-14                       | China             | 2015           | KP893891                 |
| 10  | Canine                  | CU-D133                     | Thailand          | 2016           | MT603999                 |
| 11  | Canine                  | CU-D151                     | Thailand          | 2016           | MT604000                 |
| 12  | Canine                  | CU-D20804                   | Thailand          | 2018           | MT604001                 |
| 13  | Human                   | RQ                          | United Kingdom    | 1976           | JQ743327                 |
| 14  | Human                   | DEN                         | United Kingdom    | 1980           | JQ743322                 |
| 15  | Human                   | LN                          | United Kingdom    | 1980           | JQ743324                 |
| 16  | Human                   | MEL                         | United Kingdom    | 1980           | JQ743325                 |
| 17  | Human                   | MIL                         | United Kingdom    | 1980           | JQ743326                 |
| 18  | Human                   | AGS                         | United States     | 1983           | KX060176                 |
| 19  | Human                   | L                           | China             | 2017           | MT160087                 |
| 20  | Swine                   | SER                         | Germany           | 1998           | JQ743328                 |
| 21  | Swine                   | KNU-11                      | South Korea       | 2011           | KC852177                 |
| 22  | Swine                   | JX/2015/1221/PIV5           | China             | 2015           | MT890700                 |
| 23  | Swine                   | IND/MZ/3013789              | India             | 2015           | MW273368                 |
| 24  | Swine                   | IND/MZ/3013814              | India             | 2015           | MW273369                 |
| 25  | Swine                   | SH/2015/122/PIV5            | China             | 2015           | MT890698                 |
| 26  | Swine                   | HLJ2015/DP1-1/PIV5          | China             | 2015           | MT890696                 |
| 27  | Swine                   | HLJ2015/DP2-1/PIV5          | China             | 2015           | MT890697                 |
| 28  | Swine                   | HuB/YC/2015/PIV5            | China             | 2015           | MT890699                 |
| 29  | Swine                   | SH/2015/1202                | China             | 2015           | MK028670                 |
| 30  | Swine                   | T263                        | South Korea       | 2016           | MK423233                 |
| 31  | Swine                   | T361                        | South Korea       | 2016           | MK423234                 |
| 32  | Swine                   | T361                        | South Korea       | 2016           | MK423235                 |
| 33  | Swine                   | T399                        | South Korea       | 2016           | MK423236                 |
| 34  | Swine                   | T434                        | South Korea       | 2016           | MK423237                 |
| 35  | Swine                   | Carina(PF-2)                | South Korea       | 2017           | MF170888                 |
| 36  | Swine                   | M32                         | South Korea       | 2017           | MK423238                 |
| 37  | Swine                   | M129                        | South Korea       | 2017           | MK423239                 |
| 38  | Swine                   | M197                        | South Korea       | 2017           | MK423240                 |
| 39  | Swine                   | M293                        | South Korea       | 2017           | MK423241                 |
| 40  | Swine                   | Rigel(PF-1)                 | South Korea       | 2017           | MF170889                 |
| 41  | Swine                   | N99                         | South Korea       | 2018           | MK423242                 |
| 42  | Swine                   | N163                        | South Korea       | 2018           | MK423243                 |
| 43  | Swine                   | HLJ                         | China             | 2020           | OK505006                 |
| 44  | Simian (Cell Culture)   | W3A                         | United States     | 1964           | JQ743318                 |
| 45  | Bovine                  | CH19-MMH                    | Switzerland       | 1998           | MN735204                 |
| 46  | Bovine                  | PV5-BC14                    | China             | 2014           | KM067467                 |
| 47  | Panthera tigris altaica | PIV5-SR                     | China             | 2015           | KY685075                 |
| 48  | Panthera tigris tigris  | HMZ                         | China             | 2018           | MH370862                 |
| 49  | Pangolin                | PIV5-GD18                   | China             | 2017           | MG921602                 |
| 50  | Pangolin                | CAN                         | China             | 2018           | MH362816                 |
| 51  | Lesser panda            | ZJQ-221                     | China             | 2015           | KX100034                 |
| 52  | Equine                  | XJ033                       | China             | 2018           | MN604146                 |
| 53  | Serpentine              | China/HB01/2019             | China             | 2019           | MT124463                 |
| 54  | Tick                    | PIV5/Tick/Heilongjiang/2019 | China             | 2019           | MW051776                 |
