# Supplementary material for: An Improved Duplex Real-Time Quantitative RT-PCR Assay with a Canine Endogenous Internal Positive Control for More Sensitive and Reliable Detection of Canine Parainfluenza Virus 5
Source: MDPI journal article supplement (doi:10.3390/vetsci10020142), 2023-02-10
Supplement: s1 [file s1]

**Figure S1.** Alignment of sequences between primers/probe of the L, HN, and N gene-specific qRT-PCR assays and the corresponding target genes of canine parainfluenza virus 5 (CPIV5) isolated from different hosts. (A, B, and C) Sequence variations in primers and probe binding regions for developed L gene-specific dqRT-PCR, the previously reported HN gene-specific-, and N gene-specific-qRT-PCR assays, respectively. The black arrow lines and the blunt line indicate primers and probe, respectively. A dot indicates an identical nucleotide, and a letter indicates a different base between primers/probes and the targeted gene sequences of PIV5 strains. Reverse primers are reverse complemented.
