# Supplementary material for: An Improved Duplex Real-Time Quantitative RT-PCR Assay with a Canine Endogenous Internal Positive Control for More Sensitive and Reliable Detection of Canine Parainfluenza Virus 5
Source: MDPI journal article supplement (doi:10.3390/vetsci10020142), 2023-02-10
Supplement: s1 [file s1]

**Table S2.** Comparison of diagnostic results for 16 canine parainfluenza virus 5-positive clinical samples by the newly developed L gene-specific duplex quantitative reverse transcription real-time PCR (dqRT-PCR) assay and previously reported HN gene-specific and N gene-specific qRT-PCR assays.

| NO                                     | Sample code | Sample type <sup>a</sup> | Results of different assays (Ct value) |               |                          |               |
|----------------------------------------|-------------|--------------------------|----------------------------------------|---------------|--------------------------|---------------|
|                                        |             |                          | dqRT-PCR                               |               | qRT-PCR                  |               |
|                                        |             |                          | <i>L</i> gene                          | 16s rRNA gene | <i>HN</i> gene           | <i>N</i> gene |
| 1                                      | KNU_C_037   | Lung                     | 16.19                                  | 17.88         | 22.17                    | 18.89         |
| 2                                      | KNU_C_038   | Lung                     | 30.22                                  | 16.46         | 36.19                    | 32.43         |
| 3                                      | KNU_C_095   | NPS                      | 22.06                                  | 15.94         | 27.58                    | 24.82         |
| 4                                      | KNU_C_096   | NPS                      | 32.49                                  | 19.47         | 36.64                    | 36.10         |
| 5                                      | KNU_C_107   | NPS                      | 16.59                                  | 13.29         | 21.50                    | 21.30         |
| 6                                      | KNU_C_108   | NPS                      | 32.94                                  | 17.30         | 37.27                    | 35.77         |
| 7                                      | KNU_C_109   | NPS                      | 33.63                                  | 19.08         | 39.10                    | 38.39         |
| 8                                      | KNU_C_146   | NPS                      | 27.27                                  | 16.82         | 32.68                    | 30.16         |
| 9                                      | KNU_C_213   | NPS                      | 23.99                                  | 18.60         | 27.69                    | 27.50         |
| 10                                     | KNU_C_225   | NPS                      | 27.78                                  | 20.19         | 31.00                    | 31.06         |
| 11                                     | KNU_C_226   | NPS                      | 30.42                                  | 24.37         | 34.65                    | 30.92         |
| 12                                     | KNU_C_230   | NPS                      | 24.51                                  | 20.65         | No ct value <sup>b</sup> | 28.20         |
| 13                                     | KNU_C_261   | NPS                      | 32.08                                  | 20.78         | 36.11                    | 35.16         |
| 14                                     | KNU_C_271   | NPS                      | 22.97                                  | 16.01         | 27.98                    | 24.97         |
| 15                                     | KNU_C_352   | NPS                      | 32.46                                  | 18.38         | 38.20                    | 34.52         |
| 16                                     | KNU_C_359   | NPS                      | 32.02                                  | 21.57         | 36.18                    | 34.90         |
| The Ct value range of positive samples |             |                          | 16.19-33.63                            | 13.29-24.37   | 21.5-39.1                | 18.89-38.39   |

<sup>a</sup> NPS, nasopharyngeal swab.

<sup>b</sup> The sample was retested by SYBR Green-based qRT-PCR under the same reaction conditions as previously reported CPIV5 *HN* gene-specific qRT-PCR (Windsor et al., 2006), except that the mismatched probe was excluded, and the result showed that CPIV5 RNA was successfully amplified from the sample by the SYBR Green-based qRT-PCR with a Ct value of 25.81.
