# Supplementary material for: An Improved Duplex Real-Time Quantitative RT-PCR Assay with a Canine Endogenous Internal Positive Control for More Sensitive and Reliable Detection of Canine Parainfluenza Virus 5
Source: Vet Sci. 2023 Feb 10;10(2):142. doi: 10.3390/vetsci10020142 (PMC9965950; doi:10.3390/vetsci10020142)
Supplement: Supplementary file 1 [file vetsci-10-00142-s001.zip]

Archive with 4 entries (4 files):
- Supplementary Figure S1.pdf
- Supplementary Table S1.pdf
- Supplementary Table S2.pdf
- Supplementary Table S3.xlsx
