# Supplementary material for: An Improved Duplex Real-Time Quantitative RT-PCR Assay with a Canine Endogenous Internal Positive Control for More Sensitive and Reliable Detection of Canine Parainfluenza Virus 5
Source: Vet Sci. 2023 Feb 10;10(2):142. doi: 10.3390/vetsci10020142 (PMC9965950; doi:10.3390/vetsci10020142)
Supplement: Supplementary file 1 [file vetsci-10-00142-s001.zip › Supplementary Table S3.xlsx]

## Sheet: Table S3
Table S3: The result of LOD95% of dqRT-PCR.
Fit: Proportion of positive results						v6.15
Sheet1 N2:O82
Filter: No filter
Last updated 1 2월 2023 at 9:22 by user
Fit Probit
N		70
Proportion of positive results=0		32
Proportion of positive results=1		38
Equation		probit(Proportion of positive results) = -1.403 + 3.115 log10 Log copies/reaction
Parameter		Estimate	Wald 95% CI		SE
Constant		-1.40328	-2.14043	-0.666127	0.376104
log10 Log copies/reaction		3.11509	1.94337	4.28681	0.597826
Predict X given Probability
		Probability	Predicted Log copies/reaction	95% CI
	LoD	0.95	9.51709	5.86582	15.4412
Effect of Model
	Source	-log Likelihood	DF	Likelihood ratio X² statistic	p
	Difference	23.0873	1	46.1746	1.08172e-11
	Fitted model	25.1756	68
	Null model	48.2628	69
		H0: g(x) = β0 The model is no better than a null model Y=π. H1: g(x) = β0 + βx The model is better than the null model.
